# Supplementary material for: Connectome-based machine learning models are vulnerable to subtle data manipulations
Source: PubMed Central journal article supplement — Patterns (N Y). 2023 May 15;4(7):100756. doi: 10.1016/j.patter.2023.100756 (PMC10382940; doi:10.1016/j.patter.2023.100756), 2023-05-15
Supplement: mmc1.pdf [file mmc1.pdf]

**Patterns, Volume 4**

**Supplemental information**

**Connectome-based machine learning models  
are vulnerable to subtle data manipulations**

**Matthew Rosenblatt, Raimundo X. Rodriguez, Margaret L. Westwater, Wei Dai, Corey  
Horien, Abigail S. Greene, R. Todd Constable, Stephanie Noble, and Dustin Scheinost**

Supplemental Information

|         | IQ prediction     |                   | Self-reported sex classification |                  |                  |                     |                  |                  |
|---------|-------------------|-------------------|----------------------------------|------------------|------------------|---------------------|------------------|------------------|
|         | rCPM              |                   | SVM (Linear kernel)              |                  |                  | Logistic regression |                  |                  |
| Dataset | $r$               | $q^2$             | Acc                              | Sens             | Spec             | Acc                 | Sens             | Spec             |
| ABCD    | -0.025<br>(0.010) | -0.031<br>(0.003) | 0.860<br>(0.003)                 | 0.850<br>(0.006) | 0.869<br>(0.007) | 0.805<br>(0.017)    | 0.800<br>(0.048) | 0.809<br>(0.049) |
| HCP     | 0.177<br>(0.016)  | 0.031<br>(0.006)  | 0.883<br>(0.009)                 | 0.859<br>(0.017) | 0.903<br>(0.011) | 0.767<br>(0.035)    | 0.736<br>(0.082) | 0.794<br>(0.072) |
| PNC     | 0.243<br>(0.012)  | 0.058<br>(0.005)  | 0.807<br>(0.010)                 | 0.743<br>(0.021) | 0.855<br>(0.013) | 0.711<br>(0.025)    | 0.629<br>(0.083) | 0.774<br>(0.069) |

**Table S1.** Baseline accuracies for regression models of IQ and classification models of self-reported sex in ABCD, HCP, and PNC. Prediction performance is evaluated with 10-fold cross-validation, with nested cross-validation to select  $L_2$  regularization. The numbers in parentheses reflect the standard deviation of the metrics across 100 iterations of different random seeds.

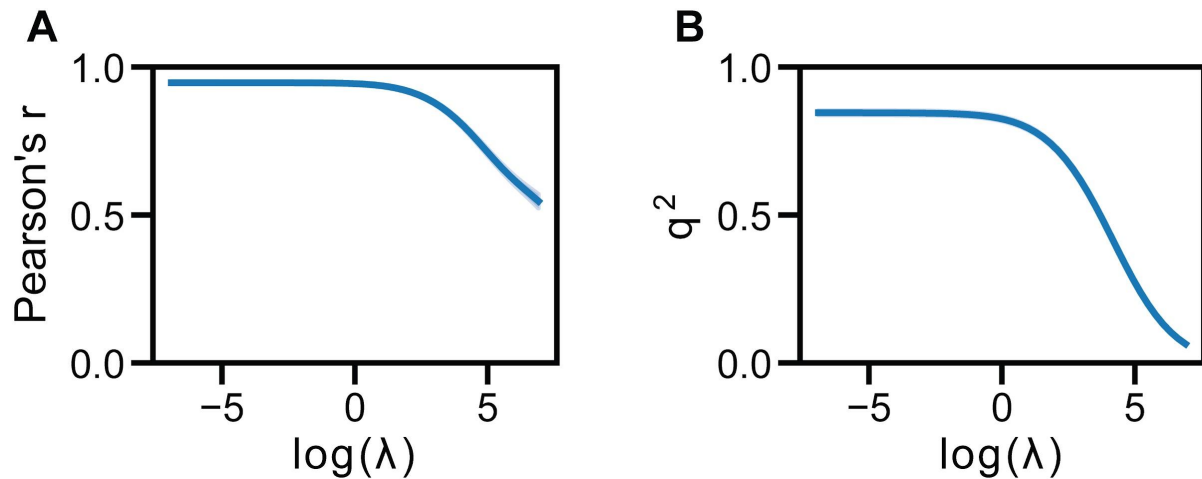

**Figure S1.** Enhancement performance for an attack scale, or mean absolute value of the enhancement pattern, of 0.01 and a variety of  $\lambda$ . The plots show the enhanced **a)** Pearson's  $r$  and **b)**  $q^2$  as a function of the regularization parameter.

|             | Ridge regression |               | Neural network |                |
|-------------|------------------|---------------|----------------|----------------|
| Scale       | $r$              | $q^2$         | $r$            | $q^2$          |
| <b>0</b>    | 0.245 (0.013)    | 0.060 (0.006) | 0.229 (0.012)  | -0.088 (0.014) |
| <b>0.01</b> | 0.441 (0.010)    | 0.159 (0.005) | 0.575 (0.011)  | 0.330 (0.012)  |
| <b>0.02</b> | 0.770 (0.005)    | 0.379 (0.004) | 0.898 (0.003)  | 0.761 (0.005)  |
| <b>0.03</b> | 0.921 (0.002)    | 0.592 (0.004) | 0.967 (0.001)  | 0.910 (0.003)  |

**Table S2.** Enhancement attacks in HCP resting-state functional connectomes to predict IQ with ridge regression and with neural networks. Experiments were repeated ten times for different cross-validation splits.

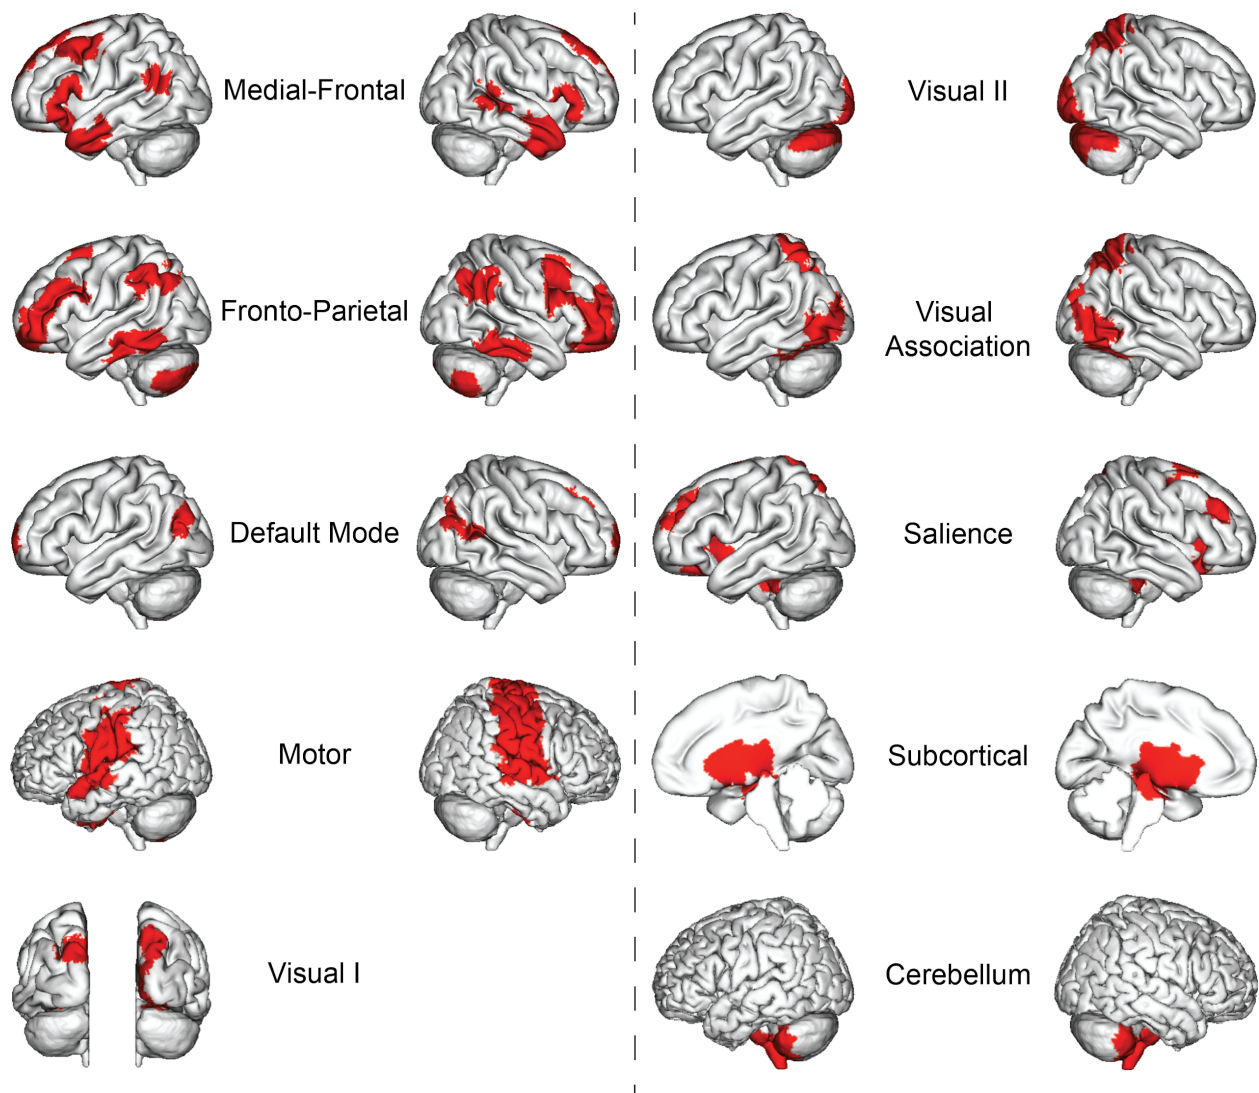

**Figure S2.** Network definitions with the Shen 268 atlas, related to Figures 3 and 7.

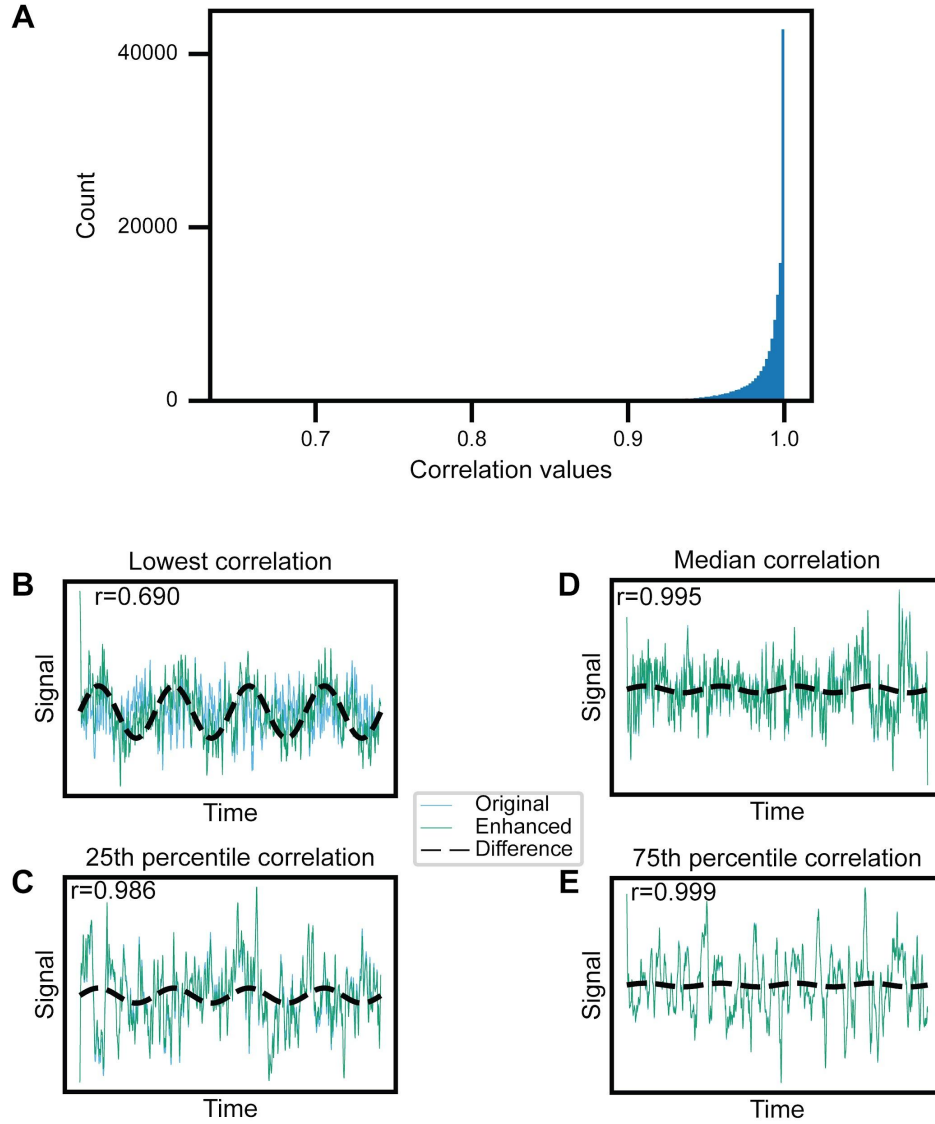

**Figure S3.** Examples of original and enhanced node time-series data, related to Figure 5. **a)** Histogram of correlation values between original and enhanced time-series data across all nodes (268) and participants (506), the vast majority of which are  $r > 0.9$ . **b)** Original and enhanced time-series data with the lowest correlation across all nodes and participants ( $r=0.690$ ). **c)** Data with the 25<sup>th</sup> percentile of correlations ( $r=0.986$ ). **d)** Data with the median correlation ( $r=0.995$ ). **e)** Data with the 75<sup>th</sup> percentile of correlations ( $r=0.999$ ).

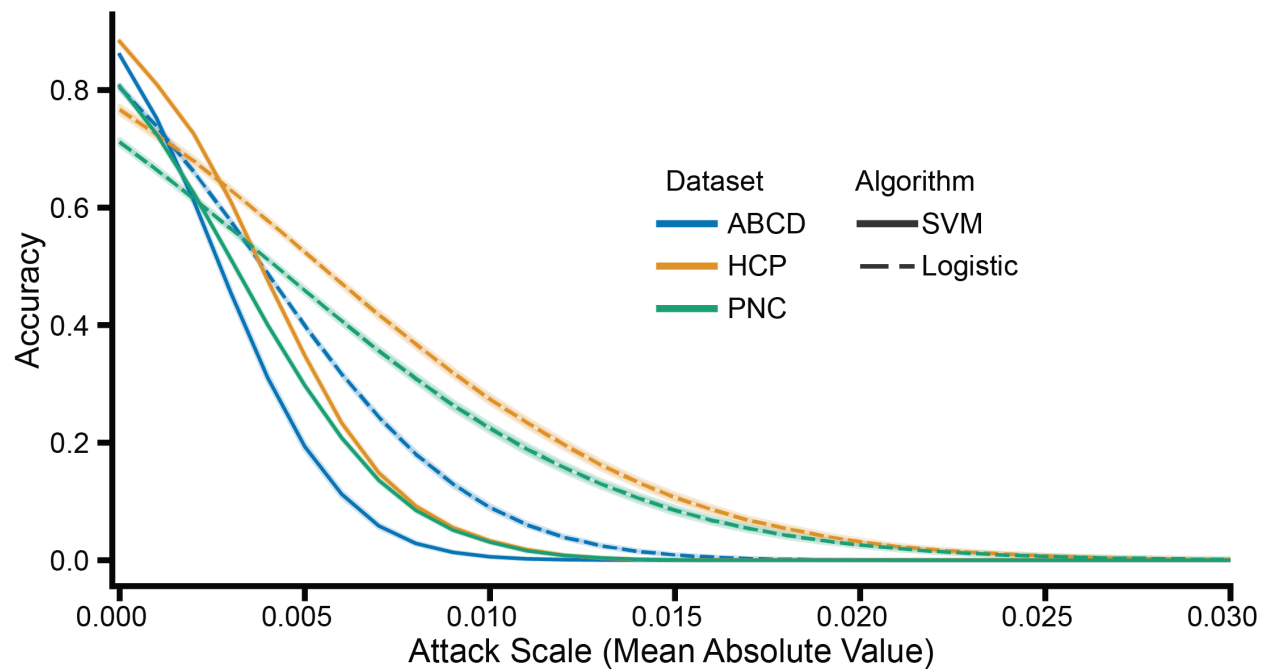

**Figure S4.** Comparison of adversarial robustness of SVM and logistic regression, related to Figure 6. The logistic regression models had higher robustness to manipulations for these particular predictions, meaning that a larger attack scale was required to decrease the accuracy. However, the baseline accuracy of logistic regression models was lower than that of SVM.
